# Supplementary material for: Associations of maternal vitamin D, PTH and calcium with hypertensive disorders of pregnancy and associated adverse perinatal outcomes: Findings from the Born in Bradford cohort study
Source: PubMed Central journal article supplement (PMC6362043; doi:10.1038/s41598-018-37600-9), 2019-02-04
Supplement: 41598_2018_37600_MOESM1_ESM.pdf [file 41598_2018_37600_MOESM1_ESM.pdf]

**Associations of maternal vitamin D, PTH and calcium with hypertensive disorders of pregnancy and associated adverse perinatal outcomes: Findings from the Born in Bradford cohort study**

Gillian Santorelli, Donald Whitelaw, Diane Farrar, Jane West, Debbie A. Lawlor

S1: Unadjusted associations of maternal circulating 25(OH)D, PTH and calcium with hypertensive disorders of pregnancy (HDP) and associated adverse outcomes overall and stratified by ethnicity.

| Outcome                          | OR (95% CI) for each outcome per 1 SD of exposure |                          |                      | P <sup>†</sup> <sub>Interaction</sub> |
|----------------------------------|---------------------------------------------------|--------------------------|----------------------|---------------------------------------|
|                                  | All (n=1010)                                      | White British<br>(n=476) | Pakistani<br>(n=534) |                                       |
| <b>HDP*</b>                      |                                                   |                          |                      |                                       |
| 25(OH)D                          |                                                   |                          |                      |                                       |
| Gestational hypertension         | 1.16 (0.95 - 1.42)                                | 0.74 (0.53 - 1.01)       | 1.58 (1.08 - 2.30)   | <0.01                                 |
| Pre-eclampsia                    | 1.36 (0.99 - 1.86)                                | 1.11 (0.71 - 1.73)       | 1.53 (0.80 - 2.81)   | 0.42                                  |
| PTH                              |                                                   |                          |                      |                                       |
| Gestational hypertension         | 0.60 (0.42 - 0.83)                                | 1.43 (0.75 - 2.74)       | 0.57 (0.34 - 0.96)   | 0.03                                  |
| Pre-eclampsia                    | 0.90 (0.58 - 1.39)                                | 1.11 (0.31 - 3.97)       | 1.16 (0.75 - 1.80)   | 0.96                                  |
| Calcium                          |                                                   |                          |                      |                                       |
| Gestational hypertension         | 1.58 (1.27 - 1.95)                                | 1.57 (1.21 - 2.03)       | 1.35 (0.91 - 2.00)   | 0.54                                  |
| Pre-eclampsia                    | 1.07 (0.71 - 1.60)                                | 1.02 (0.61 - 1.71)       | 1.00 (0.50 - 1.97)   | 0.54                                  |
| <b>Caesarean birth</b>           |                                                   |                          |                      |                                       |
| 25(OH)D                          | 1.09 (0.94 - 1.26)                                | 1.00 (0.81 - 1.24)       | 1.21 (0.91 - 1.61)   | 0.29                                  |
| PTH                              | 0.91 (0.77 - 1.07)                                | 1.06 (0.61 - 1.84)       | 0.91 (0.75 - 1.12)   | 0.62                                  |
| Calcium                          | 0.99 (0.85 - 1.15)                                | 0.94 (0.76 - 1.17)       | 1.02 (0.82 - 1.27)   | 0.63                                  |
| <b>Preterm birth</b>             |                                                   |                          |                      |                                       |
| 25(OH)D                          | 1.08 (0.83 - 1.39)                                | 1.01 (0.71 - 1.44)       | 0.85 (0.42 - 1.72)   | 0.67                                  |
| PTH                              | 1.05 (0.82 - 1.35)                                | 1.25 (0.53 - 2.99)       | 1.20 (0.91 - 1.57)   | 0.92                                  |
| Calcium                          | 0.85 (0.65 - 1.11)                                | 0.68 (0.46 - 0.99)       | 1.04 (0.68 - 1.59)   | 0.13                                  |
| <b>Small for gestational age</b> |                                                   |                          |                      |                                       |
| 25(OH)D                          | 0.58 (0.45, 0.75)                                 | 0.82 (0.58 - 1.17)       | 0.63 (0.41 - 0.97)   | 0.35                                  |
| PTH                              | 1.29 (1.12, 1.50)                                 | 0.47 (0.17 - 1.31)       | 1.13 (0.95 - 1.34)   | 0.10                                  |
| Calcium                          | 0.99 (0.83 - 1.18)                                | 1.11 (0.81 - 1.51)       | 1.05 (0.84 - 1.30)   | 0.76                                  |

\* Hypertensive disorders of pregnancy; normotensive is the reference category

<sup>†</sup> P-value for interaction with ethnicity
